## Reduced gastric injury with a novel, liquid lipid-aspirin formulation: results from a pooled, patient level analysis of two randomized endoscopy studies in healthy volunteers

D.L. Bhatt<sup>1</sup>, J. Scheiman<sup>2</sup>, D.J. Angiolillo<sup>3</sup>, P.G. Steg<sup>4</sup>, G.D. Dangas<sup>5</sup>, W. Fan<sup>6</sup>, J. Prats<sup>7</sup>, E.N. Deliargyris<sup>6</sup>

<sup>1</sup>Brigham and Women's Hospital, Boston, United States of America; <sup>2</sup>University of Virginia, Charlottesville, United States of America; <sup>3</sup>University of Florida College of Medicine, Jacksonville, United States of America; <sup>4</sup>Hospital Bichat-Claude Bernard, Paris, France; <sup>5</sup>Mount Sinai Medical Center, New York, United States of America; <sup>6</sup>PLx Pharma, Sparta, United States of America; <sup>7</sup>Elysis LLC, Carlisle, United States of America

**Funding Acknowledgement:** Type of funding source: Private company. Main funding source(s): PLx Pharma

**Background:** Gastrointestinal (GI) toxicity from aspirin is high at the time of initiation of therapy.

**Objective:** The current analysis aimed to determine rates of endoscopically detected gastroduodenal erosions and ulcers after 7 days of either immediate release aspirin (IR-ASA) or a novel, pharmaceutical lipid-aspirin complex (PL-ASA) liquid formulation that has an antiplatelet effect similar to IR-ASA.

**Methods:** Two randomized, single blind, multicenter active control studies comparing upper GI damage after 7 days of 325 mg PL-ASA or IR-ASA in healthy volunteers not taking a gastroprotectant and who had a negative baseline endoscopy were pooled at the patient level. The primary outcome was the composite of >5 erosions and/or  $\geq 1$  ulcer ( $\geq 3$  mm deep) assessed by a treatment-blinded reviewer at repeat endoscopy on day 7.

**Results:** Out of 451 randomized subjects (mean age 57 years, 47% males), 441 completed the 7-day endoscopy and represent the full analysis set. PL-ASA significantly reduced the primary outcome by 34% compared with IR-ASA (25.7% vs. 39%,  $p=0.0032$ ) (figure). Notably, for ulcers there was a 61% reduction with PL-ASA (6.0% vs. 14.8%,  $p=0.0018$ ) (Figure 1). The mean number of gastric erosions per patient was also reduced with PL-ASA ( $2.8 \pm 7.3$  vs.  $4.2 \pm 7.5$ ,  $p < 0.0001$ ), while erosions in the duodenum were not different ( $1.4 \pm 7.1$  vs.  $0.9 \pm 2.3$ ,  $p=0.45$ ).

**Conclusion:** The novel PL-ASA liquid capsules reduced rates of GI injury compared with IR-ASA tablets. The combination of reliable platelet inhibition with less GI injury makes PL-ASA an attractive new aspirin therapy option.

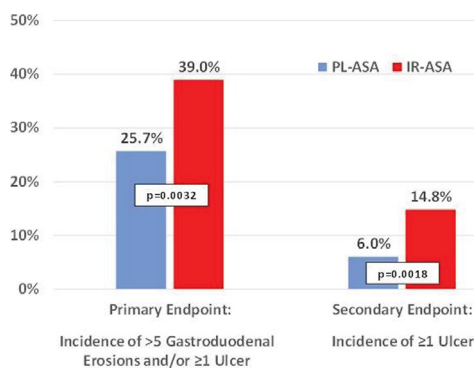

Figure 1
